# Supplementary material for: Rnnotator: an automated de novo transcriptome assembly pipeline from stranded RNA-Seq reads
Source: PubMed Central journal article supplement (PMC3152782; doi:10.1186/1471-2164-11-663), 2010-11-24
Supplement: 1471-2164-11-663suppl1.pdf [file 1471-2164-11-663suppl1.pdf]

**Supplementary Table 1.** Effect of k-mer filtering on assembly quality. Comparisons were performed using the SC5314 dataset.

|                | <b>dereplication<br/>only</b> | <b>dereplication,<br/>filter</b> | <b>filter,<br/>dereplication</b> |
|----------------|-------------------------------|----------------------------------|----------------------------------|
| # of reads     | 40,800,738                    | 21,412,023                       | 19,793,607                       |
| Accuracy       | 95.4                          | 95.0                             | 95.0                             |
| Completeness   | 84.7                          | 80.4                             | 79.3                             |
| Contiguity     | 57.9                          | 58.0                             | 55.9                             |
| Runtime (hrs.) | 5.5                           | 3.2                              | 5.1                              |
